# Supplementary material
Source: publisher figshare collection journal article supplement (https://karger.figshare.com/articles/dataset/_/8197829)
Supplement: Supplementary file 1 [file 1]

Archive with 2 entries (2 files):
- 499925sm_2.pdf
- DRM499925sm_1.pdf
